# Supplementary material for: Breathing catalyst-supports: CO2 adjustable and magnetic recyclable “smart” hybrid nanoparticles
Source: Royal Society of Chemistry journal article supplement (doi:10.1039/c6ra22762g), 2016-01-01
Supplement: c6ra22762g1.pdf [file c6ra22762g1.pdf]

## Supporting Information

# Breathing catalyst-supports: CO<sub>2</sub> adjustable and magnetic recyclable “smart” hybrid nanoparticles

Anchao Feng,<sup>a</sup> Yun Wang,<sup>a</sup> Liao Peng,<sup>a</sup> Xiaosong Wang<sup>b</sup> and Jinying Yuan<sup>\*a,c</sup>

<sup>a</sup> Key Lab of Organic Optoelectronics & Molecular Engineering of Ministry of Education

Department of Chemistry, Tsinghua University, Beijing 100084, P.R. China

E-mail: yuanjy@mail.tsinghua.edu.cn

<sup>b</sup> Department of Chemistry, Waterloo Institute of Nanotechnology, University of Waterloo, 200

University Avenue West, Waterloo, ON N2L 3G1, Canada

<sup>c</sup> State Key Laboratory of Polymer Materials Engineering (Sichuan University)

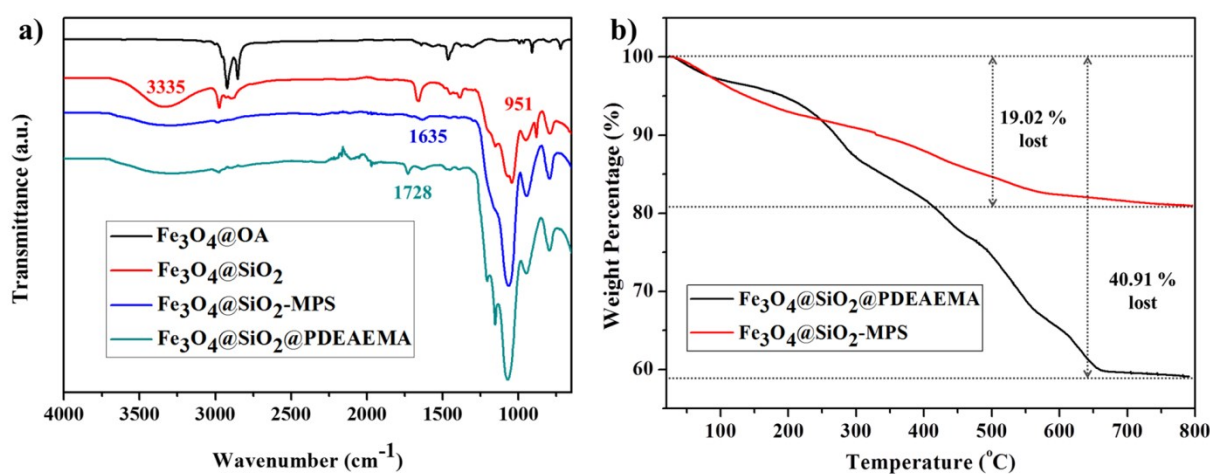

**Fig. S1** a) FT-IR spectra of Fe<sub>3</sub>O<sub>4</sub>@OA, Fe<sub>3</sub>O<sub>4</sub>@SiO<sub>2</sub>, Fe<sub>3</sub>O<sub>4</sub>@SiO<sub>2</sub>-MPS and Fe<sub>3</sub>O<sub>4</sub>@SiO<sub>2</sub>@PDEAEMA. b) TGA curves of Fe<sub>3</sub>O<sub>4</sub>@SiO<sub>2</sub>-MPS and Fe<sub>3</sub>O<sub>4</sub>@SiO<sub>2</sub>@PDEAEMA.

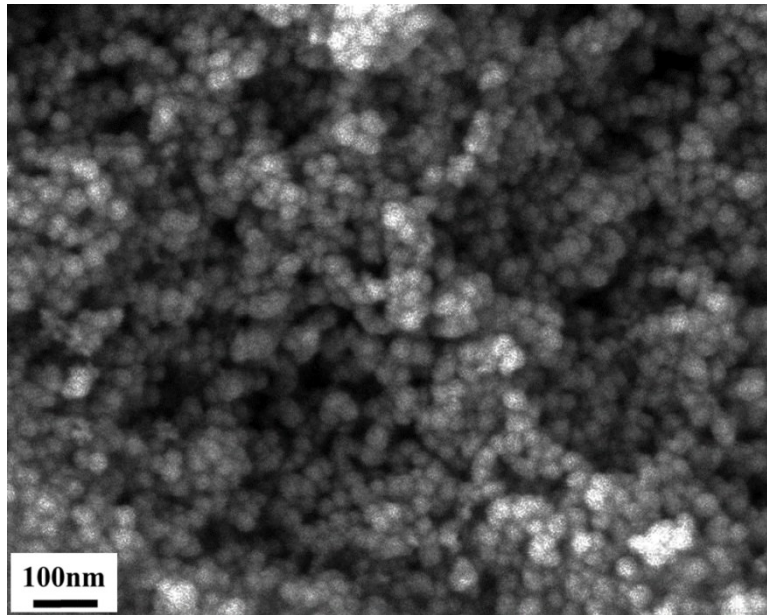

**Fig. S2** SEM image of Fe<sub>3</sub>O<sub>4</sub>@SiO<sub>2</sub>-PDEAEMA hybrid microspheres.

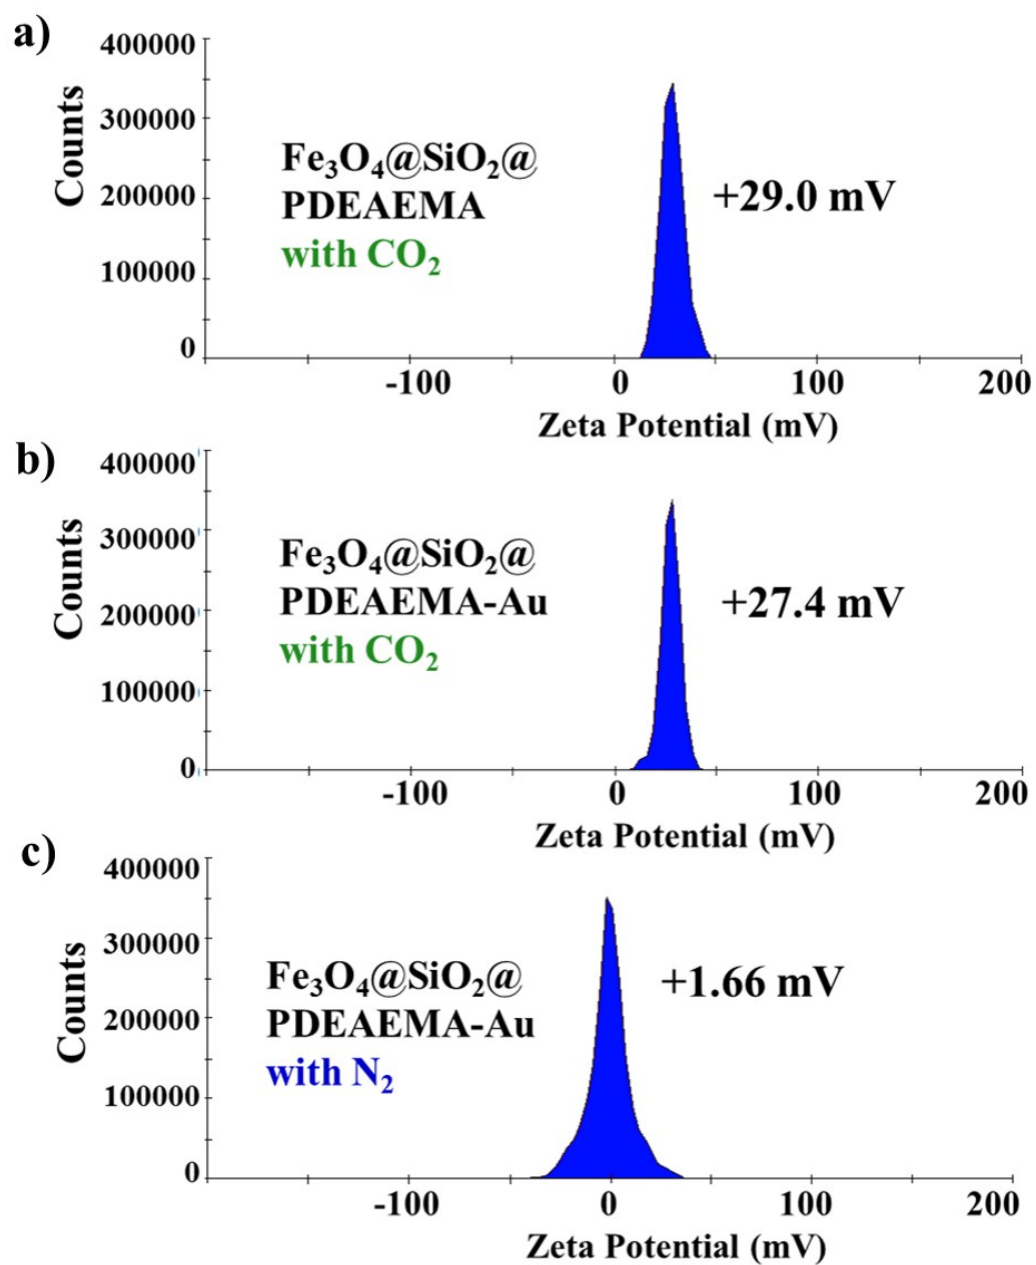

**Fig. S3** Zeta potential of a) Fe<sub>3</sub>O<sub>4</sub>@SiO<sub>2</sub>@PDEAEMA nanoparticles after treatment of CO<sub>2</sub>; b) Fe<sub>3</sub>O<sub>4</sub>@SiO<sub>2</sub>@PDEAEMA-Au nanocomposites after treatment of CO<sub>2</sub>; c) Fe<sub>3</sub>O<sub>4</sub>@SiO<sub>2</sub>@PDEAEMA-Au nanocomposites after treatment of N<sub>2</sub>.

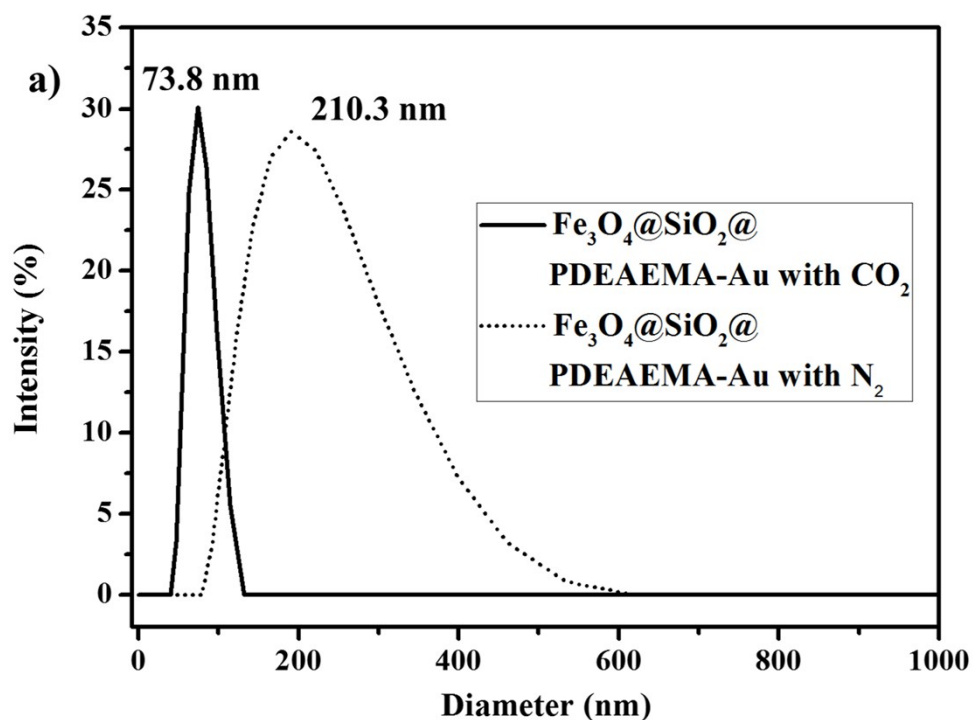

**Fig. S4** The average diameter of Fe<sub>3</sub>O<sub>4</sub>@SiO<sub>2</sub>-PDEAEMA-Au nanocomposites by DLS after CO<sub>2</sub> and N<sub>2</sub> purging for 15 min.

#### **Determination of mass ratio of polymer through TGA data**

Based on the TGA results, we can assume that there was 80.98 g residuum in 100 g of Fe<sub>3</sub>O<sub>4</sub>@SiO<sub>2</sub>. Same component of residuum will be kept for the sample of Fe<sub>3</sub>O<sub>4</sub>@SiO<sub>2</sub>@PDEAEMA, as the polymer component should be removed totally at 800 °C. The mass of PDEAEMA can be calculated as 80.98 g/(1-40.91 %)-100 g, resulted in 37.05 g. Therefore, the mass ratio of polymer can be decided as 37.05 g/ (100 g+37.05g) = 27.04 wt %.
